# Supplementary material for: Development and Validation of a Trigger Tool for Identifying Drug-Related Emergency Department Visits
Source: MDPI journal article supplement (doi:10.3390/ijerph18168572), 2021-08-13
Supplement: s1 [file s1]

Supplemental Table S1. The basic characteristics of patients who visits ED in the each hospital during the study period

|                     |          | A hospital        | B hospital        | C hospital        | D hospital       | Total             | <i>P-value</i> |
|---------------------|----------|-------------------|-------------------|-------------------|------------------|-------------------|----------------|
| All cause ED visits | N        | 18,804            | 22,627            | 20,607            | 14,686           | 76,724            |                |
| Traffic accidents   | N<br>(%) | 1,013<br>(5.4%)   | 1,066<br>(4.7%)   | 791<br>(3.8%)     | 830<br>(5.7%)    | 3,700<br>(4.8%)   |                |
| Trauma              |          | 1,511<br>(8.0%)   | 2,843<br>(12.6%)  | 1,396<br>(6.8%)   | 710<br>(4.8%)    | 6,460<br>(8.4%)   |                |
| Sex (Female)        | N<br>(%) | 9,571<br>(50.9%)  | 11,879<br>(52.5%) | 9,788<br>(47.5%)  | 6,594<br>(44.9%) | 37,833<br>(44.9%) | <0.001         |
| Age                 |          | 38.2±23.7         | 35.6±25.5         | 41.2±26.6         | 51.2±23.3        | 40.7±25.6         | <0.001         |
| 0 - 17              | N<br>(%) | 1,918<br>(10.2%)  | 2,919<br>(12.9%)  | 2,782<br>(13.5%)  | 911<br>(6.2%)    | 8,529<br>(11.1%)  |                |
| 18 - 64             | N<br>(%) | 13,426<br>(71.4%) | 15,251<br>(67.4%) | 12,570<br>(61.0%) | 8,577<br>(58.4%) | 49,824<br>(64.9%) |                |
| ≥ 65                | N<br>(%) | 3,460<br>(18.4%)  | 4,458<br>(19.7%)  | 5,255<br>(25.5%)  | 5,199<br>(35.4%) | 18,371<br>(24.0%) |                |

ED, Emergency Department
